1     **Antimicrobial activity of a repurposed harmine-derived compound on**  
2     **extensively drug-resistant *Acinetobacter baumannii* clinical isolates**

3

4     Anke Breine<sup>1,2</sup>, Mégane Van Gysel<sup>3</sup>, Mathias Elsocht<sup>4</sup>, Clémence Whiteway<sup>1,2</sup>, Chantal  
5     Philippe<sup>5</sup>, Théo Quinet<sup>6</sup>, Adam Valcek<sup>1,2</sup>, Johan Wouters<sup>3</sup>, Steven Ballet<sup>4</sup> & Charles Van der  
6     Henst<sup>1,2\*</sup>

7

8     \* corresponding author: [charles.vanderhenst@vub.vib.be](mailto:charles.vanderhenst@vub.vib.be)

9

10    <sup>1</sup> Microbial Resistance and Drug Discovery, VIB-VUB Center for Structural Biology, VIB,  
11    Flanders Institute for Biotechnology, Brussels, Belgium.

12    <sup>2</sup> Structural Biology Brussels, Vrije Universiteit Brussel (VUB), Brussels, Belgium.

13    <sup>3</sup> Namur Medicine & Drug Innovation Center (NAMECIC), University of Namur (UNamur),  
14    Namur, Belgium.

15    <sup>4</sup> Research Group of Organic Chemistry, Departments of Chemistry and Bioengineering  
16    Sciences, Vrije Universiteit Brussel, Pleinlaan 2, B-1050 Brussels, Belgium

17    <sup>5</sup> Research Unit in the Biology of Microorganisms (URBM), NARILIS, University of Namur  
18    (UNamur), Belgium.

19    <sup>6</sup> Molecular Biology and Evolution, C.P. 160/16 Université Libre de Bruxelles (ULB), Avenue F.D.  
20    Roosevelt 50, B-1050 Brussels, Belgium.

21

22

23

24

## 25 **Synopsis**

26 **Objectives:** The spread of antibiotic resistant bacteria is an important threat for human  
27 healthcare. *Acinetobacter baumannii* bacteria impose one of the major issues, as multidrug-  
28 to pandrug-resistant strains have been found, rendering some infections untreatable. In  
29 addition, *A. baumannii* is a champion in surviving in harsh environments, being capable of  
30 resisting to disinfectants and to persist prolonged periods of desiccation. Due to the high  
31 degree of variability found in *A. baumannii* isolates, the search for new antibacterials is  
32 challenging. Here, we screened a compound library to identify compounds active against  
33 recent isolates of *A. baumannii* bacteria.

34 **Methods:** A repurposing drug screen was undertaken to identify *A. baumannii* growth  
35 inhibitors. One hit was further characterized by determining its IC<sub>50</sub> and testing its activity on  
36 43 recent clinical *A. baumannii* isolates, amongst which 40 are extensively drug- and  
37 carbapenem-resistant strains.

38 **Results:** The repurposing screen led to the identification of a harmine-derived compound,  
39 called HDC1, which proved to have bactericidal activity on the multidrug-resistant AB5075-  
40 VUB reference strain with an IC<sub>50</sub> of 48.23 µM. In addition, HDC1 impairs growth of all 43  
41 recent clinical *A. baumannii* isolates.

42 **Conclusions:** We identified a compound with inhibitory activity on all tested, extensively drug-  
43 resistant clinical *A. baumannii* isolates.

44

45

46

47

## 48 **Introduction**

49 The rise of antibiotic resistant bacteria is a global threat for healthcare, making it possible to  
50 succumb to diseases that were previously treatable.<sup>1</sup> This has been acknowledged by both  
51 the World Health Organization (WHO) and the Centers for Disease Control and Prevention  
52 (CDC), which generated a list of drug-resistant pathogens for which new antibiotics are  
53 urgently needed.<sup>2,3</sup> The top priorities of these lists are antibiotic-resistant *Acinetobacter*  
54 *baumannii* bacteria.

55 *A. baumannii* is a Gram-negative, opportunistic bacterium, belonging to the ESKAPE group  
56 (*Enterococcus faecium*, *Staphylococcus aureus*, *Klebsiella pneumoniae*, *Acinetobacter*  
57 *baumannii*, *Pseudomonas aeruginosa* and *Enterobacter* spp.) of nosocomial pathogens.<sup>4,5</sup>

58 While the pathogen is ubiquitous (*i.e.* it can be found in soil, on human skin and in water sources),  
59 its presence especially imposes a threat in clinical settings.<sup>6,7</sup> This is due to a remarkable  
60 combination of resistance capabilities of *A. baumannii*, which is able to persist prolonged  
61 periods of desiccation, to resist to disinfectants and to acquire drug resistance at a high rate.

62<sup>8,9</sup> Infections caused by *A. baumannii* commonly occur in immunocompromised patients and  
63 manifest as ventilator-assisted pneumonia, bacteremia and to a lesser extent skin or urinary  
64 tract infections.<sup>10</sup> Treatment of these infections becomes increasingly difficult, as multidrug-  
65 resistant, to extensively drug-resistant or even pandrug-resistant strains have been reported,  
66 with the latter being resistant to all available antibiotics, including carbapenems.<sup>11,12</sup> An  
67 important hurdle in the development of new antimicrobials against *A. baumannii* is the high  
68 diversity found between isolates, leading to a still open pan-genome.<sup>13</sup>

69 In this paper, we aimed at the discovery of a compound active against most clinical isolates.

70 We performed a repurposing screen on a compound library, which led to the identification of

71 a harmine-derived compound, called HDC1, with inhibitory activity on the growth of all the  
72 tested recent clinical isolates, amongst which 40 are extensively drug- and carbapenem-  
73 resistant.

74

## 75 **Material and methods**

### 76 **Compound library and synthesis of HDC1**

77 A compound library of the Namur Medicine & Drug Innovation Center (NAMEDIC) was  
78 provided for a growth inhibition screen against *A. baumannii*. All compounds were dissolved  
79 in 100% DMSO and used for the initial screen at 100  $\mu$ M. The active compound HDC1 (1-  
80 methyl-2-benzyl-7-benzyloxy-9-benzyl- $\beta$ -carbolin-2-ium bromide) was synthesized as  
81 previously described<sup>14</sup> with the following optimizations: 1-methyl-7-hydroxy- $\beta$ -carboline was  
82 synthesized by adding 1-methyl-7-methoxy- $\beta$ -carboline (0.600 g, 2.83 mmol, 1 equiv.),  
83 hydrobromic acid (12 ml, 48% in H<sub>2</sub>O) and acetic acid (12 ml) into a round-bottom flask,  
84 equipped with reflux condenser. The mixture was refluxed overnight under argon atmosphere  
85 and subsequently added to distilled water (100 ml). The precipitate was isolated via filtration,  
86 washed with cold water and dried under vacuum yielding 1-methyl-7-hydroxy- $\beta$ -carboline  
87 with 81% (0.454 g) yield. <sup>1</sup>H-NMR (500 MHz, DMSO-d<sub>6</sub>)  $\delta$  (ppm): 12.59 (s, 1H), 10.62 (s, 1H),  
88 8.39-8.29 (m, 2H), 8.21 (d, J = 8.7 Hz, 1H), 7.03 (d, J = 1.7 Hz, 1H), 6.89 (dd, J = 8.7, 1.7 Hz, 1H),  
89 2.94 (s, 3H). Next, 1-methyl-2-benzyl-7-benzyloxy-9-benzyl- $\beta$ -carbolin-2-ium bromide was  
90 synthesized. First 1-methyl-7-hydroxy- $\beta$ -carboline (0.500 g, 2.52 mmol, 1 equiv.) was dissolved  
91 in anhydrous N,N,-dimethylformamide (20 ml) into a flame-dried microwave vial under argon  
92 atmosphere. Then KOtBu (0.849 g, 7.57 mmol, 3 equiv.) was added and the mixture was stirred  
93 for 30 minutes at room temperature. Subsequently benzyl bromide (3.00 ml, 25.2 mmol, 10  
94 equiv.) was added and the mixture was heated overnight at 75°C. Afterwards the crude

95 mixture was filtered, and the precipitate was washed with CH<sub>2</sub>Cl<sub>2</sub>. The volatiles in the filtrate  
96 were removed under reduced pressure and the crude product was subjected to column  
97 chromatography (cyclohexane/ethyl acetate) yielding the desired product with 46% (0.638 g)  
98 yield. <sup>1</sup>H-NMR (500 MHz, DMSO-d<sub>6</sub>) δ (ppm): 8.86 (d, J = 6.6 Hz, 1H), 8.72 (d, J = 6.6 Hz, 1H),  
99 8.49 (d, J = 8.8 Hz, 1H), 7.57 (d, J = 2.1 Hz, 1H), 7.50-7.46 (m, 2H), 7.40-7.25 (m, 9H), 7.23 (dd,  
100 J = 8.8, 2.1 Hz, 1H), 7.12 (d, J = 7.2 Hz, 2H), 6.99 (d, J = 7.2 Hz, 2H), 6.02 (s, 2H), 5.99 (s, 2H),  
101 5.27 (s, 2H), 2.85 (s, 3H). <sup>13</sup>C-NMR (126 MHz, DMSO-d<sub>6</sub>) δ (ppm): 162.8 (Cq), 148.0 (Cq), 139.6  
102 (Cq), 137.5 (Cq), 136.2 (Cq), 135.4 (Cq), 134.7 (Cq), 133.5 (Cq), 129.1 (CH), 129.0 (CH), 128.5  
103 (CH), 128.3 (CH), 127.5 (CH), 126.6 (CH), 125.4 (CH), 124.9 (CH), 114.7 (CH), 113.7 (CH), 112.8  
104 (Cq), 95.0 (CH), 70.1 (CH<sub>2</sub>), 59.8 (CH<sub>2</sub>), 48.3 (CH<sub>2</sub>), 16.0 (CH<sub>3</sub>). The spectroscopic data were in  
105 accordance with those reported by Frédérick *et al.* (2012).<sup>14</sup>

106

107

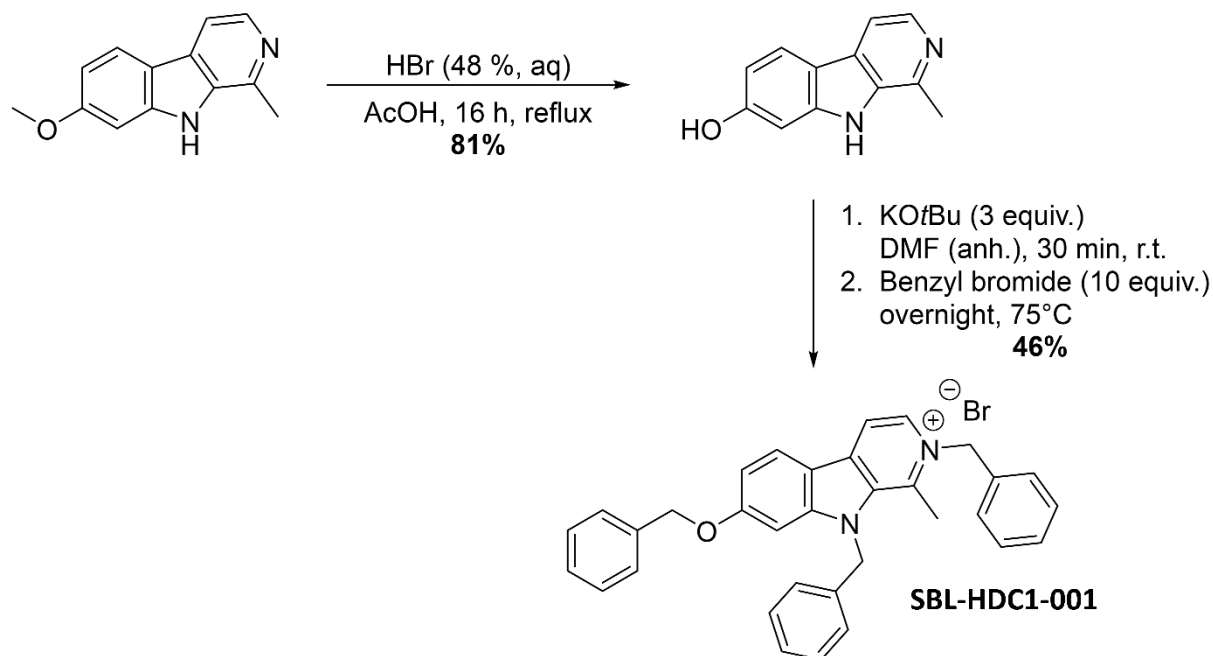

111 **OD measurements**

112 All *A. baumannii* reference strains and clinical isolates were cultured at 37°C in LB broth media  
113 for 16h before subsequent experiments. For IC<sub>50</sub> determination, bacterial cells corresponding  
114 to OD<sub>600nm</sub>=0.1 were transferred to a 96 well flat bottom plate (Greiner, Austria) containing  
115 varying concentrations of HDC1 (0.1; 1; 10; 25; 50; 75; 100 and 1000 µM) in LB broth media  
116 with 1% DMSO. For determination of the activity of HDC1 on the 43 clinical *A. baumannii*  
117 isolates, bacterial cells corresponding to OD<sub>600nm</sub>=0.1 were transferred to a 96 well flat bottom  
118 plate (Greiner, Austria) containing 100 µM of HDC1 in LB broth media with 1% DMSO. For both  
119 experiments, the positive control included bacterial cells corresponding to OD<sub>600nm</sub>=0.1 of the  
120 used strains in LB broth media with 1% DMSO. The negative control included both LB broth  
121 media and LB broth media supplemented with 1% DMSO. Collection of data was done using  
122 the Cytation 1 (BioTek, United States). The OD<sub>600</sub> absorbance of all bacterial cultures was  
123 measured every 30 min for 24h at a temperature of 37°C and agitation of 355 cpm (cycles per  
124 minute). In all analysis, growth inhibition is defined as decreasing absorbance values over time  
125 compared to the positive control. The data were measured in biological triplicate.

126

127 **CFU determination**

128 After absorbance measurements for IC<sub>50</sub> determination, the positive control (AB5075-VUB  
129 grown in LB with 1% DMSO) and AB5075-VUB grown in presence of 100 µM HDC1, were  
130 resuspended in PBS, brought to the same OD<sub>600nm</sub> and plated on LB agar plates in appropriate  
131 dilutions. After 16 h incubation of the LB agar plates at 37°C, CFUs were counted to assess any  
132 bacteriostatic or bactericidal effect. All data was measured in biological triplicate. To estimate  
133 the initial bacterial load, the relationship between the absorbance at OD<sub>600nm</sub> and CFUs was

134 determined for the strain AB5075-VUB. This was done by plating serial dilutions of bacterial  
135 cultures with a known OD<sub>600nm</sub> on LB agar and counting the corresponding CFUs (see Table S1).

136

### 137 **IC<sub>50</sub> calculation**

138 For the determination of the IC<sub>50</sub>, GraphPad Prism 9 (GraphPad Software, LLC) was used. After  
139 20 hours, the OD<sub>600nm</sub> absorbance kinetic data were obtained and normalized using the  
140 positive control absorbance value as 100% viability and the absorbance value of 1 mM HDC1  
141 as 0% viability. The analysis was then done on the normalized data by nonlinear regression  
142 curve fitting. The IC<sub>50</sub> value is shown with a 95% confidence interval (CI).

143

### 144 **Statistical analysis**

145 All data shown are represented as mean ± standard deviation of three biological replicates,  
146 except otherwise stated. CFU were statistically analyzed by an unpaired t-test. All growth  
147 curves were statistically analyzed by a Mann Whitney test. The p values < 0.05 were  
148 considered significant.

149

## 150 **Results**

### 151 **Repurposing screen reveals compound with inhibitory activity on AB5075-VUB**

152 The initial screen from a chemical library of the Namur Medicine & Drug Innovation Center  
153 from the University of Namur (UNamur) aimed at the identification of growth inhibitors for  
154 problematic multidrug-resistant *A. baumannii* strains. The strain initially used for this screen  
155 is a multidrug-resistant *A. baumannii* reference strain, AB5075-VUB. This strain is a derivative  
156 from the parental strain AB5075 that was clonally isolated in our laboratory at the VUB (Vrije  
157 Universiteit Brussel).

158 The screen showed complete growth inhibition by one compound called HDC1, for it is a  
159 harmine-derived compound (**Figure 1**). Harmine is a natural  $\beta$ -carboline known to have many  
160 pharmacological activities such as antimicrobial, antifungal and antitumor properties. <sup>14,15</sup>  
161 HDC1 was originally synthesized for an anticancer drug screen. Interestingly, compounds with  
162 anticancer activity have lately been explored as potential antimicrobials. <sup>16</sup> In line with this  
163 tendency, HDC1 was further characterized for other activities.

164

#### 165 **HDC1 has bactericidal activity on AB5075-VUB**

166 To determine the potency of the compound, the minimum concentration required for 50%  
167 growth inhibition,  $IC_{50}$ , was determined for the AB5075-VUB strain. The analysis showed that  
168 HDC1 has an  $IC_{50}$  of 48.23  $\mu$ M (95% CI 44.76-51.83) (**Figure 1C**). To determine the potential  
169 antimicrobial effect of HDC1 on AB5075-VUB viability, the strain was grown in presence of 100  
170  $\mu$ M of HDC1. After 24 h incubation, the bacteria were resuspended in fresh media without the  
171 compound and plated on LB agar plates for CFUs enumeration. After 24h incubation, the  
172 number of recovered bacteria is significantly different when bacteria are incubated with the  
173 compound compared to the control group (**Figure 1D**). While an increase in CFUs is observed  
174 for the control group, a decrease of CFUs is observed in the presence of HDC1, compared to  
175 the initial bacterial load. This shows a significant bactericidal activity of HDC1 on the  
176 multidrug-resistant AB5075-VUB reference strain.

177

#### 178 **HDC1 has broad inhibitory activity on all the tested clinical isolates**

179 *A. baumannii* has a highly dynamic genome. <sup>17</sup> The presence of mobile genetic elements and  
180 the efficient acquisition of genes through horizontal gene transfer are not only responsible for  
181 the pathogen's success in obtaining drug resistance and environmental persistence, but they



182 are also the reason isolates have become more and more diverse.<sup>13,17,18</sup> The core genome of  
183 the pathogen's strains is reported to be relatively small and the accessory genome of strains  
184 can be up to 25-46% unique.<sup>13,18</sup> This heterogeneity found in isolates renders the search for  
185 antimicrobial compounds increasingly difficult. It is therefore important for a new potential  
186 antimicrobial to exert its activity not only on a few *A. baumannii* strains, but on a multitude of  
187 diverse and clinically relevant isolates.

188 To determine the activity of HDC1 on recent isolates, we used 43 multidrug-resistant *A.*  
189 *baumannii* strains. These strains were isolated between 2014 to 2017, in different Belgian  
190 hospitals, of varying patient infections sites and have varying antibiograms.<sup>19</sup> The resistance  
191 profiles of 40 of these isolates show that they can even be classified as extensively drug-  
192 resistant, as previously defined for *Acinetobacter* spp.<sup>12</sup> In addition to these recent clinical  
193 isolates, three frequently used reference strains were also included. Two of these strains,  
194 ATCC19606 and ATCC17978, are older type strains, compared to the more recent and  
195 multidrug-resistant AB5075 reference strain.<sup>11,20</sup> The third reference strain, DSM30011, is an  
196 environmental isolate.<sup>21</sup>

197 The growth of all tested strains was impaired by the presence of HDC1 (**Figure 2**), with low,  
198 intermediate, or complete inhibition levels. An overview of the different resistance profiles  
199 against HDC1 can be found in **Table 1**. Complete inhibition of growth is observed for all three  
200 reference strains and 17 recent isolates, while most of the clinical isolates show an  
201 intermediate inhibition profile. The AB193-VUB isolate showed the least sensitivity to HDC1.  
202 No correlation could be found between the sensitivity of the tested strains to HDC1 and the  
203 antibiogram profiles of the strains.<sup>19</sup>

204

205

## 206 Discussion

207 In this study, a repurposing drug screen led to the discovery of a compound with inhibitory  
208 activity on the growth of a multidrug-resistant *Acinetobacter baumannii* strain, AB5075-VUB.  
209 This compound, named HDC1, is a harmine-derivative previously designed to have anticancer  
210 properties. The anticancer screen showed that the compound acts as a protein synthesis  
211 inhibitor at a concentration of 0.7  $\mu\text{M}$ .<sup>14</sup> In our study, HDC1 was shown to have bactericidal  
212 activity on AB5075-VUB with an  $\text{IC}_{50}$  of 48.23  $\mu\text{M}$ . The cytotoxicity of the compound in human  
213 cells can thus be expected to be significant. This limits the potential of HDC1 as a new  
214 antimicrobial without further modification of the molecule. However, as multidrug-,  
215 extensively drug- and pandrug-resistant *A. baumannii* strains are emerging and spreading,  
216 every option seems to be explored.

217 Due to the high diversity between *A. baumannii* isolates, one of the main hurdles in the  
218 discovery of new compounds is to find compounds capable of targeting the majority of the  
219 isolates. Here, we report a compound to have inhibitory activity on all the tested and recent  
220 clinical *A. baumannii* isolates. The strains were chosen to be as diverse as possible: originating  
221 from different Belgian hospitals, different patients, varying anatomical infection sites and  
222 varying antibiograms.<sup>19</sup> Our test shows various degrees of growth inhibition: from complete  
223 to intermediate to only slight inhibition. In addition, the 4 reference strains used in our study  
224 all show a high degree of sensitivity to HDC1. Taken together, this raises the following  
225 questions (i) what contributes to this difference in growth inhibition levels, (ii) why do more  
226 recent clinical isolates show a higher resistance to HDC1 while the less recent reference strains  
227 are sensitive, (iii) what could be the target(s) of HDC1 and (iv) why is not the whole AB5075-  
228 VUB bacterial population killed by HDC1 in the tested conditions, since a significant  
229 bactericidal effect is observed? The phase variation observed in AB5075 might be the answer

230 to the last question, for which bacteria in different states might show different levels of  
231 resistance against HDC1.<sup>22</sup> Interestingly, a recent study showed that HDC1 inhibits the  
232 phosphoserine phosphatase of *Mycobacterium tuberculosis*, MtSerB2.<sup>23</sup> MtSerB2 catalyzes  
233 the last step in the L-serine biosynthetic pathway and is involved in immune evasion  
234 mechanisms of *M. tuberculosis*.<sup>23</sup> In AB5075-VUB, a homolog of MtSerB2 is present: AbSerB.  
235 This indicates a putative target of HDC1 in *A. baumannii*. A possible explanation for the  
236 different growth inhibition profiles of the clinical isolates could be the presence of mutations  
237 in the *serb* gene. However, in our study, no correlation could be found between mutations in  
238 *serb* and the growth inhibition profiles of the *A. baumannii* isolates. Interestingly, it has been  
239 shown for *M. tuberculosis* that certain compounds are more efficient at inhibiting growth of  
240 the bacterium itself, than inhibiting the enzyme only, suggesting different mechanisms of  
241 action or intracellular accumulation of the compounds.<sup>24</sup> Additional resistance mechanisms,  
242 potentially countering such effects, could explain the higher resistance to HDC1 of some  
243 clinical isolates. Nevertheless, HDC1 has broad activity on all the tested recent clinical *A.*  
244 *baumannii* isolates of our study, which prompts the further exploration of this compound  
245 and/or cognate putative target in *A. baumannii*.

246

## 247 **Conclusion**

248 In conclusion, HDC1 is a potent harmine-derived compound with antibacterial activity  
249 identified using a multidrug-resistant *A. baumannii* strain, that also significantly inhibits the  
250 growth of diverse, recent, and extensively drug-resistant clinical *A. baumannii* isolates.

251

252

## 253 **Author Contributions**

254 Drafting of the manuscript: AB and CV. Corrections of the manuscript: AB, MVG, ME, CP, PB,  
255 TDH, OD, JW, SB and CV. HDC1 production: ME and SB. Preliminary drug screen: TQ, CP and  
256 CV. Experiments: AB, CW and CV. Data analyses: AB, MVG, JW and CV.

257

258

## 259 **Acknowledgements**

260 We are grateful to Pr. Tom Coenye for providing us the strain AB5075 and Dr. Suzana Salcedo  
261 for the strains ATCC19606, ATCC17978 and DSM30011, as well as for fruitful discussions. We  
262 would like to thank Pr. Pierre Bogaerts, Pr. Te-din Huang and Pr. Olivier Denis for providing the  
263 recent clinical isolates of *A. baumannii*. We also thank the members of Namedic (NARILIS-  
264 UNamur), in particular Pr. B. Masereel and L. Pochet for their research that allowed setting up  
265 the chemical library used in the present screening.

266

267

## 268 **Funding**

269 AB is recipient of a PhD fellowship Strategic Basic Research of the Research Foundation –  
270 Flanders (FWO, File number: 77258). ME and SB acknowledge financial support of the  
271 Research Council at the Vrije Universiteit Brussel (VUB) through the IRP funding scheme. CV  
272 acknowledges the financial support from the Flanders Institute for Biotechnology (VIB). This  
273 project has received funding from the European Union’s Horizon 2020 research and  
274 innovation program under the Marie Skłodowska-Curie grant agreement No 748032.

275

## 276 **Transparency declarations**

277 None to declare.

278

## 279 **References**

280 **1.** Wong D, Nielsen TB, Bonomo RA, Pantapalangkoor P, Luna B, Spellberg B. Clinical and  
281 pathophysiological overview of Acinetobacter infections: A century of challenges. *Clin*  
282 *Microbiol Rev* 2017; **30**: 409–47.

283 **2.** World Health Organization. Global priority list of antibiotic-resistant bacteria to guide  
284 research, discovery, and development of new antibiotics. *WHO* 2017.

285 **3.** Centers for Disease Control and Prevention. Carbapenem-resistant Acinetobacter. *CDC's*  
286 *2019 Antibiot Resist Rep* 2019.

287 **4.** Santajit S, Indrawattana N. Mechanisms of Antimicrobial Resistance in ESKAPE Pathogens.  
288 *Biomed Res Int* 2016; **2016**.

289 **5.** Rice LB. Federal funding for the study of antimicrobial resistance in nosocomial  
290 pathogens: No ESKAPE. *J Infect Dis* 2008; **197**: 1079–81.

291 **6.** Vallenet D, Nordmann P, Barbe V, *et al.* Comparative analysis of acinetobacters: Three  
292 genomes for three lifestyles. *PLoS One* 2008; **3**.

293 **7.** Wieland K, Chhatwal P, Vonberg RP. Nosocomial outbreaks caused by *Acinetobacter*  
294 *baumannii* and *Pseudomonas aeruginosa*: Results of a systematic review. *Am J Infect Control*  
295 2018; **46**: 643–8.

296 **8.** Zeidler S, Müller V. Coping with low water activities and osmotic stress in *Acinetobacter*  
297 *baumannii*: significance, current status and perspectives. *Environ Microbiol* 2019; **21**: 2212–  
298 30.

- 299 **9.** Da Silva G, Domingues S. Insights on the Horizontal Gene Transfer of Carbapenemase  
300 Determinants in the Opportunistic Pathogen *Acinetobacter baumannii*. *Microorganisms*  
301 2016; **4**: 29.
- 302 **10.** Weiner LM, Webb AK, Limbago B, *et al.* Antimicrobial-Resistant Pathogens Associated  
303 With Healthcare-Associated Infections: Summary of Data Reported to the National  
304 Healthcare Safety Network at the Centers for Disease Control and Prevention, 2011–2014.  
305 *Infec Control Hosp Epidemiol* 2016; **37**: 1288–301.
- 306 **11.** Gallagher LA, Ramage E, Weiss EJ, *et al.* Resources for genetic and genomic analysis of  
307 emerging pathogen *Acinetobacter baumannii*. *J Bacteriol* 2015; **197**: 2027–35.
- 308 **12.** Magiorakos AP, Srinivasan A, Carey RB, *et al.* Multidrug-resistant, extensively drug-  
309 resistant and pandrug-resistant bacteria: An international expert proposal for interim  
310 standard definitions for acquired resistance. *Clin Microbiol Infect* 2012; **18**: 268–81.
- 311 **13.** Adams MD, Goglin K, Molyneaux N, *et al.* Comparative genome sequence analysis of  
312 multidrug-resistant *Acinetobacter baumannii*. *J Bacteriol* 2008; **190**: 8053–64.
- 313 **14.** Frédérick R, Bruyère C, Vancaeynest C, *et al.* Novel trisubstituted harmine derivatives  
314 with original in vitro anticancer activity. *J Med Chem* 2012; **55**: 6489–501.
- 315 **15.** Patel K, Gadewar M, Tripathi R, Prasad SK, Patel DK. A review on medicinal importance,  
316 pharmacological activity and bioanalytical aspects of beta-carboline alkaloid ‘Harmine’. *Asian*  
317 *Pac J Trop Biomed* 2012; **2**: 660–4.
- 318 **16.** Cheng YS, Sun W, Xu M, *et al.* Repurposing screen identifies unconventional drugs with  
319 activity against multidrug resistant *Acinetobacter baumannii*. *Front Cell Infect Microbiol*  
320 2019; **9**: 1–10.
- 321 **17.** Wright MS, Iovleva A, Jacobs MR, Bonomo RA, Adams MD. Genome dynamics of  
322 multidrug-resistant *Acinetobacter baumannii* during infection and treatment. *Genome Med*

323 2016; **8**: 1–12.

324 **18.** Imperi F, Antunes LCS, Blom J, *et al.* The genomics of *Acinetobacter baumannii*: Insights  
325 into genome plasticity, antimicrobial resistance and pathogenicity. *IUBMB Life* 2011; **63**:  
326 1068–74.

327 **19.** Valcek A, Bogaerts P, Denis O, Huang T-D, Van der Henst C. Molecular epidemiology of  
328 carbapenem-resistant *Acinetobacter baumannii* strains in Belgian acute-care hospitals.  
329 *medRxiv* 2021.

330 **20.** Harding CM, Hennon SW, Feldman MF. Uncovering the mechanisms of *Acinetobacter*  
331 *baumannii* virulence. *Nat Rev Microbiol* 2018; **176**: 139–48.

332 **21.** Repizo GD, Viale AM, Borges V, *et al.* The environmental *Acinetobacter baumannii* isolate  
333 DSM30011 reveals clues into the preantibiotic era genome diversity, virulence potential, and  
334 niche range of a predominant nosocomial pathogen. *Genome Biol Evol* 2017; **9**: 2292–307.

335 **22.** Tipton KA, Dimitrova D, Rather PN. Phase-variable control of multiple phenotypes in  
336 *Acinetobacter baumannii* strain AB5075. *J Bacteriol* 2015; **197**: 2593–9.

337 **23.** Pierson E, Haufroid M, Gosain TP, Chopra P, Singh R, Wouters J. Identification and  
338 Repurposing of Trisubstituted Harmine Derivatives as Novel Inhibitors of Mycobacterium  
339 tuberculosis Phosphoserine Phosphatase. *Molecules* 2020; **25**: 1–16.

340 **24.** Haufroid M, Wouters J. Targeting the serine pathway: A promising approach against  
341 tuberculosis? *Pharmaceuticals* 2019; **12**: 1–20.

342

343

344 **Figures**

345

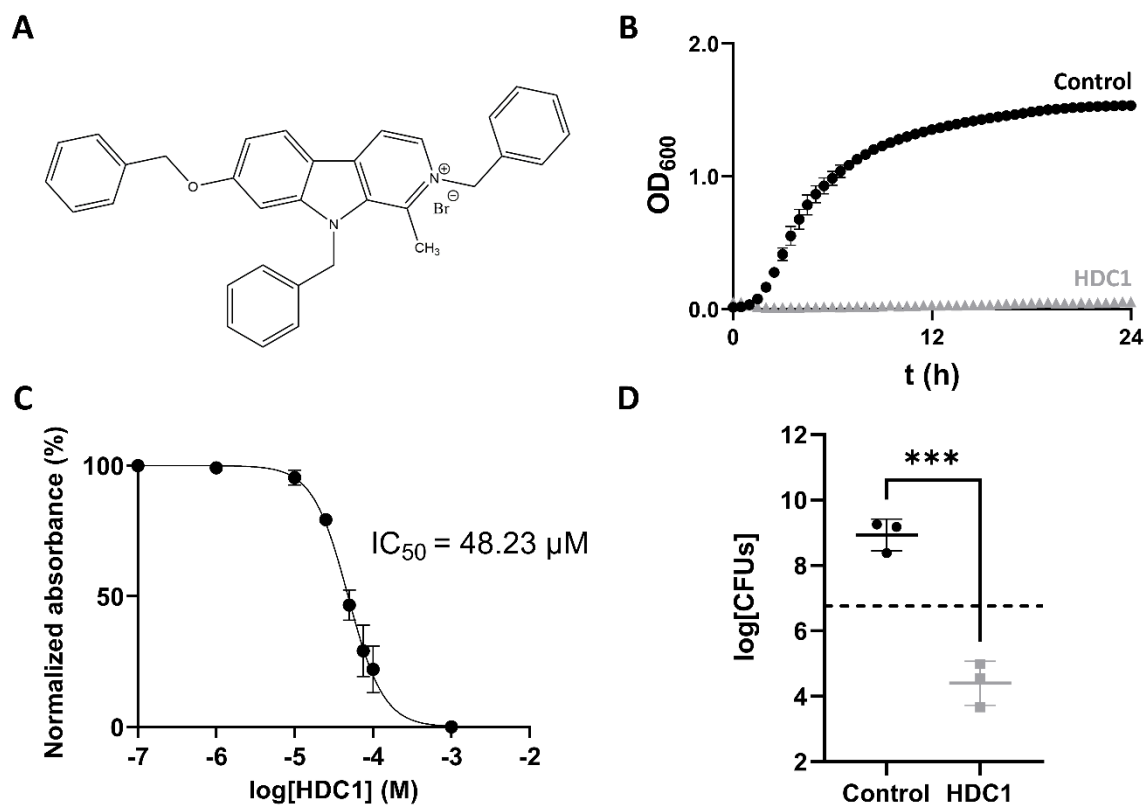

346

347

348 **Figure 1. A** Structure of HDC1. **B** Growth curve of AB5075-VUB in presence (grey triangles) and  
349 absence (black spheres) of HDC1. **C.** Non-linear regression curve of normalized absorbance  
350 reads in function of compound concentration. **D.** Number of viable bacteria after 24 h  
351 incubation without and with HDC1. The initial bacterial load is represented by the dashed line  
352 on the plot. All data points in this figure are shown as mean±standard deviation of three  
353 independent biological replicates.

354

355

356



357

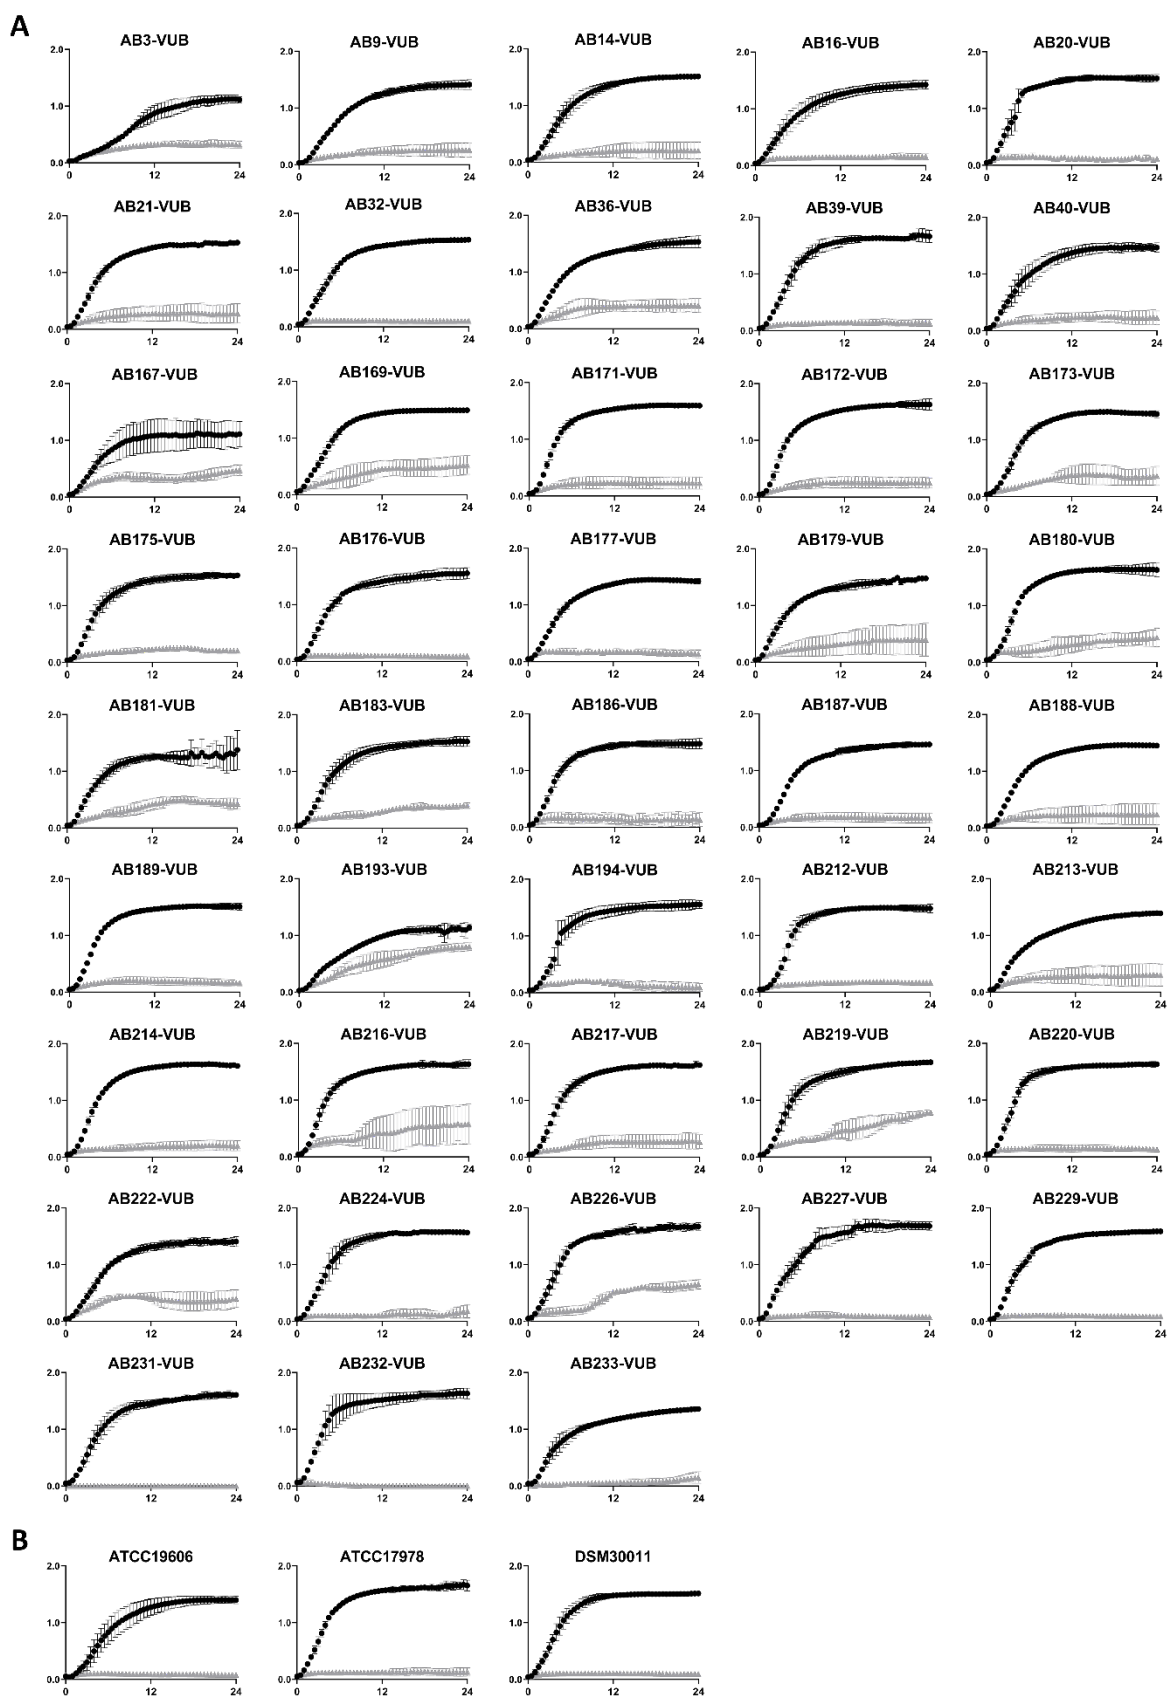

358

359

360 **Figure 2. A.** Growth curves of 43 recent clinical *A. baumannii* isolates. **B.** Growth curves of 3  
361 *A. baumannii* reference strains (ATCC19606, ATCC17978 and DSM30011). All strains were  
362 incubated with 100  $\mu$ M of HDC1 (grey triangles) or without HDC1 (black spheres) for 24 h. All  
363 data points are shown as mean $\pm$ standard deviation of three independent biological  
364 replicates. X axis and y axis correspond to respectively time (h) and absorbance values  
365 measured at 600 nm.  
366  
367

368 **Table 1.** Growth inhibition levels on three reference strains and 43 recent clinical isolates of

369 *A. baumannii*

| <b>Level of growth inhibition</b> |                     |                 |
|-----------------------------------|---------------------|-----------------|
| <b>Low</b>                        | <b>Intermediate</b> | <b>Complete</b> |
| AB193-VUB                         | AB3-VUB             | ATCC19606       |
|                                   | AB9-VUB             | ATCC17978       |
|                                   | AB14-VUB            | DSM30011        |
|                                   | AB21-VUB            | AB16-VUB        |
|                                   | AB36-VUB            | AB20-VUB        |
|                                   | AB40-VUB            | AB32-VUB        |
|                                   | AB167-VUB           | AB39-VUB        |
|                                   | AB169-VUB           | AB176-VUB       |
|                                   | AB171-VUB           | AB177-VUB       |
|                                   | AB172-VUB           | AB186-VUB       |
|                                   | AB173-VUB           | AB187-VUB       |
|                                   | AB175-VUB           | AB189-VUB       |
|                                   | AB179-VUB           | AB194-VUB       |
|                                   | AB180-VUB           | AB212-VUB       |
|                                   | AB181-VUB           | AB214-VUB       |
|                                   | AB183-VUB           | AB220-VUB       |
|                                   | AB188-VUB           | AB227-VUB       |
|                                   | AB193-VUB           | AB229-VUB       |
|                                   | AB213-VUB           | AB231-VUB       |
|                                   | AB216-VUB           | AB232-VUB       |
|                                   | AB217-VUB           |                 |
|                                   | AB219-VUB           |                 |
|                                   | AB222-VUB           |                 |
|                                   | AB224-VUB           |                 |
|                                   | AB226-VUB           |                 |
|                                   | AB233-VUB           |                 |

370

371

## 372 **Supplementary data**

373

374 **Table S1.** Relationship between the absorbance ( $OD_{600nm}$ ) and the colony forming units  
375 (CFUs) per ml for the strain AB5075-VUB. The values are shown for overnight cultures that  
376 were diluted for accurate absorbance measurements. Rep = Biological replicate. At an  
377  $OD_{600nm}=1$ , the CFU/ml corresponds to  $3.2 \pm 0.3 \cdot 10^8$  CFU/ml.

|                         | <b>Rep 1</b>      | <b>Rep 2</b>      | <b>Rep 3</b>      | <b>Average</b>    | <b>SD</b>         |
|-------------------------|-------------------|-------------------|-------------------|-------------------|-------------------|
| <b>OD<sub>600</sub></b> | 6.4               | 6.5               | 6.3               | 6.4               | 0.1               |
| <b>CFU/ml</b>           | $1.92 \cdot 10^9$ | $2.06 \cdot 10^9$ | $2.23 \cdot 10^9$ | $2.07 \cdot 10^9$ | $1.55 \cdot 10^8$ |

378
